# Supplementary material
Source: PubMed Central journal article supplement (PMC5901979)

**Appendix**  
**Effects of Before School Physical Activity on Obesity Prevention and Wellness**  
**Whooten et al.**

**Appendix Figure 1.** Logic model for the Build Our Kids Success (BOKS) program.

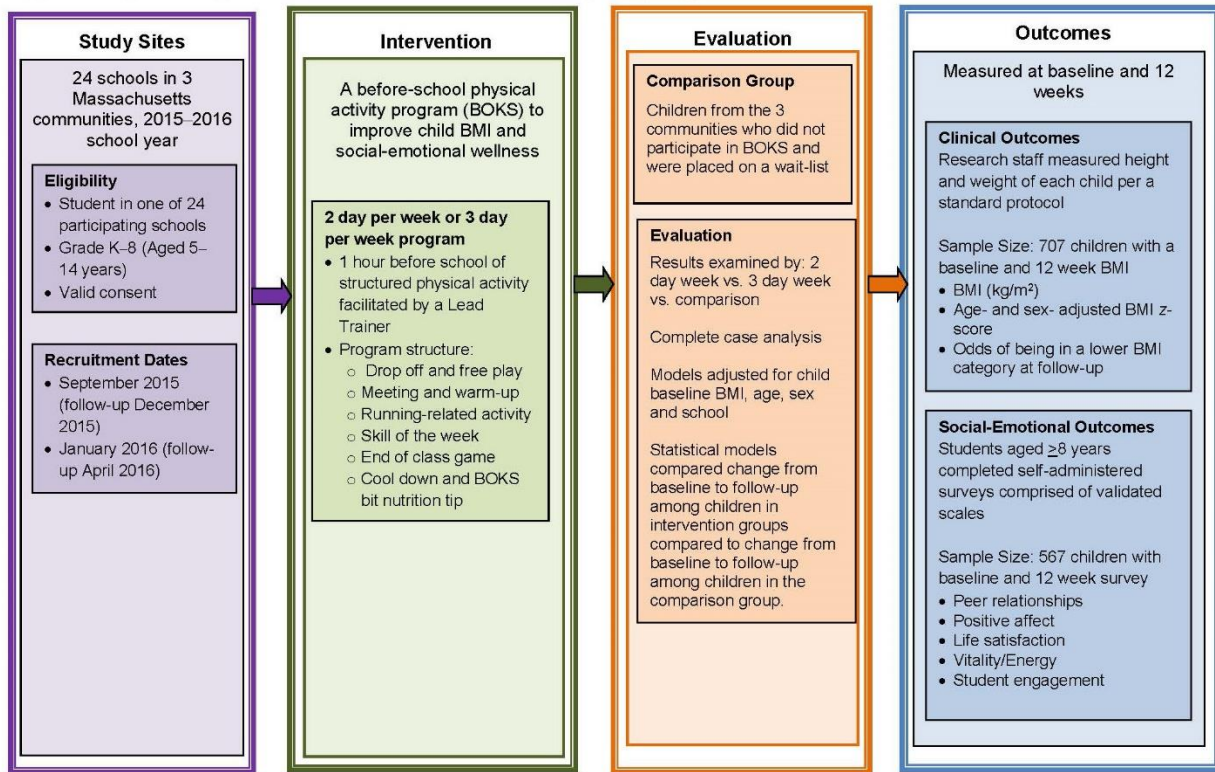

Supplement: NIHMS955708-supplement.pdf [file NIHMS955708-supplement.pdf]
